# Supplementary material for: Disturbance Severity and Human–Nature Relationships: A New Approach to Analyze People’s Well-Being along a Bark Beetle Infestation Gradient
Source: MDPI journal article supplement (doi:10.3390/f13111954), 2022-11-18

## Fragebogen der Online-Umfrage

- **Alter:**
  - **Geschlecht:**
  - **Höchster Bildungsabschluss:**
  - **Beruf:**
  - **Haben sie schon einmal einen Nationalpark in Deutschland besucht, wenn ja welchen? ja/nein**
- 

- **Bitte bewerten Sie folgende Aussagen von 5 (stimme voll und ganz zu) über 4 (stimme eher zu), 3 (weder noch/unentschieden), 2 (stimme eher nicht zu) bis 1 (stimme gar nicht zu).**

1. Es macht mich traurig, wenn Naturlandschaften bebaut werden.
2. Ich spare Wasser indem ich dusche anstelle zu baden.
3. Die Menschen werden aussterben, wenn sie nicht bald in Einklang mit der Natur leben.
4. Ich schalte immer das Licht aus, wenn ich es nicht mehr brauche.
5. Schmutziger Rauch aus Fabrikaminen macht mich wütend.
6. Es ist interessant zu wissen, welche Kreaturen in Teichen und Flüssen leben.
7. Man braucht kein Land für den Natur- und Artenschutz vorsehen.
8. Unsere Gesellschaft wird weiterhin auch die größten Umweltprobleme lösen.
9. Die stille Natur draußen macht mich ängstlich.
10. Am Rand eines Weihers zu sitzen und Libellen zu beobachten ist langweilig.
11. Unser Planet hat unbegrenzte Ressourcen.
12. Die Natur ist immer in der Lage, sich selbst wieder herzustellen/zu erholen.
13. Wir müssen Wälder roden, damit Getreide angebaut werden kann.
14. Wir müssen mehr Straßen bauen, damit die Leute aufs Land fahren können.
15. Die Menschen machen sich zu viel Sorgen über die Umweltverschmutzung.
16. Unkräuter sind genauso wichtig wie hübsche Blumen.
17. Sorgen um die Umwelt halten oft Entwicklungsprojekte auf.
18. Menschen haben nicht das Recht, die Natur zu ändern, wie sie es für richtig halten.
19. Menschen sind nicht wichtiger als andere Lebewesen.
20. Nicht nur Pflanzen und Tiere von wirtschaftlicher Bedeutung sollten geschützt werden.

- Bitte bewerten sie wie sehr sie sich mit der Natur verbunden fühlen

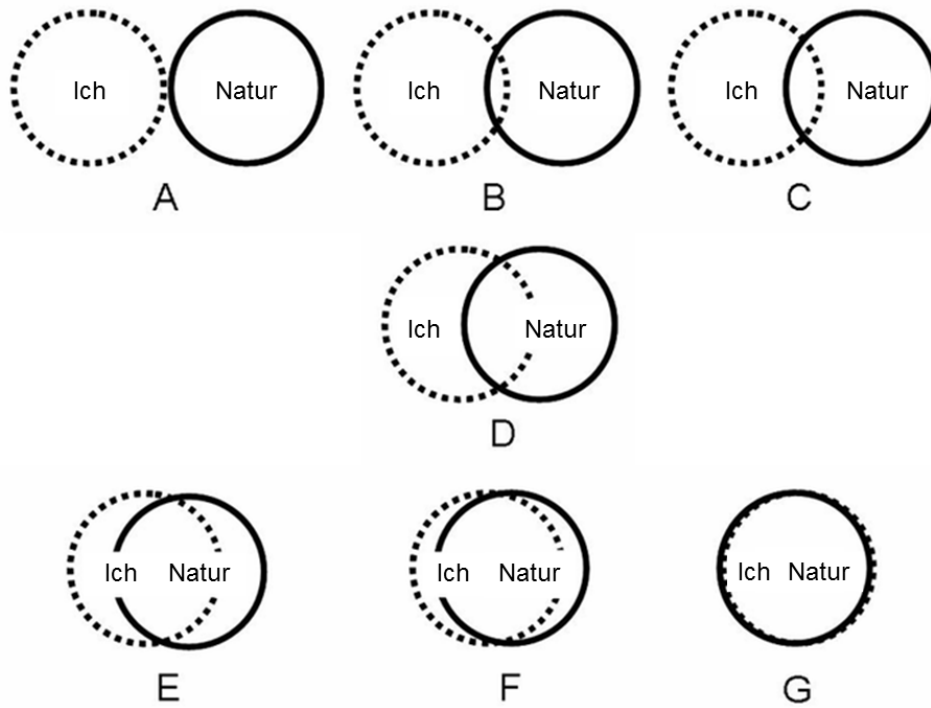

- **Stellen Sie sich vor, sie unternehmen eine Wanderung durch einen Nationalpark. Der Weg führt Sie durch Wälder mit unterschiedlichen Anteilen lebender und abgestorbener Bäume. Bitte bewegen Sie den Schieber an die Stelle, an der ihr persönliches Wohlbefinden vermutlich am höchsten ist.**

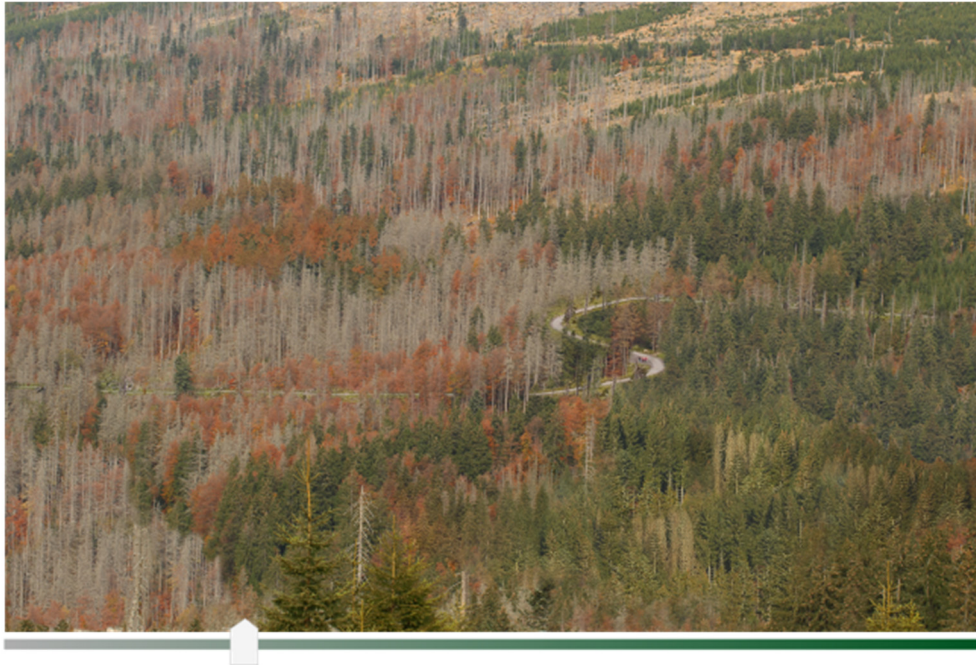

## **Questionnaire of the online survey**

(Translated from German to English)

- **Age:**
  - **Gender:**
  - **Highest educational attainment:**
  - **Occupation:**
  - **Have you ever visited a national park in Germany, if so which one? yes/no**
- 
- **Please rate the following statements from 5 (fully agree) to 4 (rather agree), 3 (neither/undecided), 2 (rather disagree) to 1 (strongly disagree).**
    1. it makes me sad when natural landscapes are built on.
    2. I save water by taking a shower instead of a bath.
    3. people will die out if they don't live in harmony with nature soon.
    4. I always turn off the light when I don't need it anymore.
    5. dirty smoke from factory chimneys makes me angry.
    6. it is interesting to know what creatures live in ponds and rivers.
    7. there is no need to set aside land for nature and species conservation.
    8. our society will continue to solve even the biggest environmental problems.
    9. the silent nature outside makes me afraid.
    10. sitting at the edge of a pond watching dragonflies is boring.
    11. our planet has unlimited resources.
    12. nature is always able to restore/recover itself.
    13. we need to clear forests so that crops can be grown.
    14. we need to build more roads so people can go to the countryside.
    15. people worry too much about pollution.
    16. weeds are as important as pretty flowers.
    17. worries about the environment often hold up development projects.
    18. people do not have the right to change nature as they see fit.

19. people are not more important than other living things.

20. not only plants and animals of economic importance should be protected.

- Please rate how connected you feel to nature

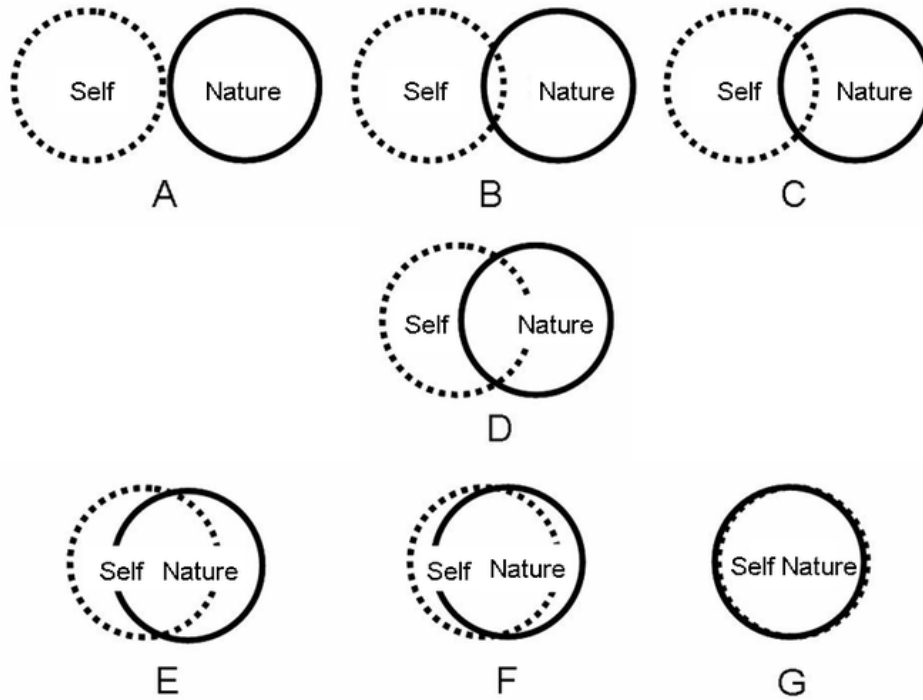

- **Imagine you are hiking through a forested national park. The hiking trail crosses areas with different proportions of living and dead trees (0–100%). Please move the slider to the position at which your personal well-being would be the highest**

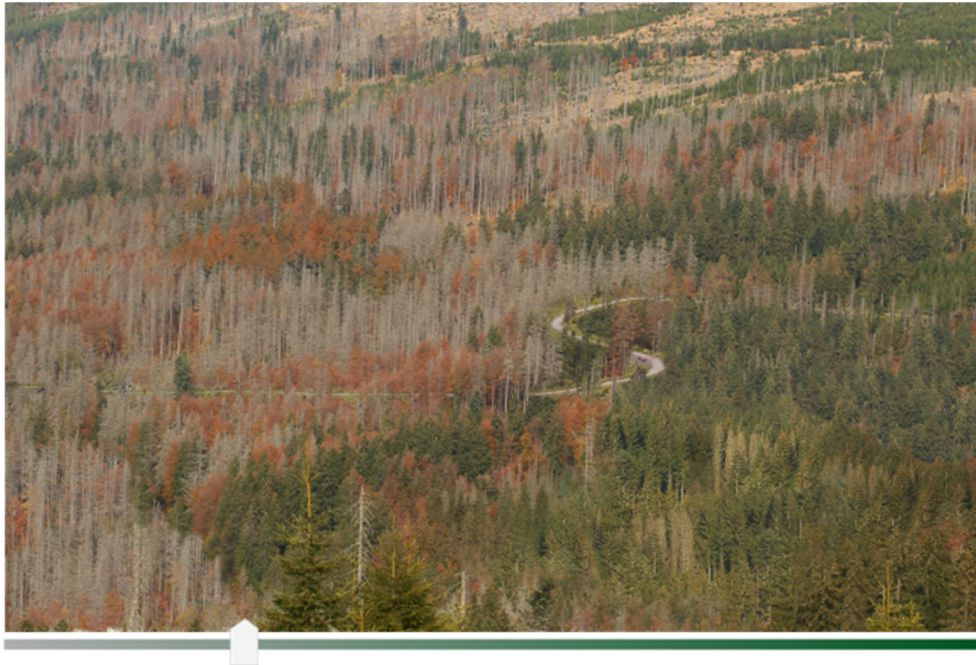

Supplement: s1 [file s1]
